# Supplementary material
Source: PubMed Central journal article supplement (PMC8155698)
Supplement: NIHMS1663285-supplement-Supplemental_Table_1.pdf [file NIHMS1663285-supplement-Supplemental_Table_1.pdf]

Supplemental Table 1. Baseline characteristics of all matched extrahepatic cholangiocarcinoma (ECC) cases, its subtypes perihilar cholangiocarcinoma (pCCA) and distal cholangiocarcinoma (dCCA) and controls

| Variable                          | All ECC<br>(N=394) | pCCA<br>(N=259) | dCCA<br>(N=135) | All controls<br>(N=788) | #p-value |
|-----------------------------------|--------------------|-----------------|-----------------|-------------------------|----------|
| Age in years, mean (SD)           | 65.7 (13.9)        | 62.8 (13.8)     | 71.3 (12.2)     | 65.6 (13.8)             | 0.90     |
| Sex, male                         | 268 (68.0%)        | 175 (67.6%)     | 93 (68.9%)      | 538 (68.3%)             | 0.93     |
| Race                              |                    |                 |                 |                         | 1.00     |
| White, <i>n</i> (%)               | 380 (96.4%)        | 248 (95.8%)     | 132 (97.8%)     | 760 (96.4%)             |          |
| Non-white, <i>n</i> (%)           | 14 (3.6%)          | 11 (4.2%)       | 3 (2.2%)        | 28 (3.6%)               |          |
| BMI; mean (SD)                    | 27.8 (6.0)         | 27.5 (6.2)      | 28.4 (5.5)      | 28.8 (5.3)              | <0.001   |
| Statin use, <i>n</i> (%)          | 73 (18.5%)         | 48 (18.5%)      | 25 (18.5%)      | 403 (51.1%)             | <0.001   |
| DM, <i>n</i> (%)                  | 123 (31.2%)        | 76 (29.3%)      | 47 (34.8%)      | 303 (38.5%)             | 0.015    |
| IBD, <i>n</i> (%)                 | 41 (10.4%)         | 34 (13.1%)      | 7 (5.2%)        | 11 (1.4%)               | <0.001   |
| Cirrhosis, <i>n</i> (%)           | 75 (19.0%)         | 65 (25.1%)      | 10 (7.4%)       | 59 (7.5%)               | <0.001   |
| Cholangitis, <i>n</i> (%)         | 113 (28.7%)        | 87 (34%)        | 26 (19.3%)      | 1 (0.1%)                | <0.001   |
| PSC, <i>n</i> (%)                 | 125 (31.7%)        | 94 (36.3%)      | 31(23%)         | 0 (0.0%)                | <0.001   |
| HCV, <i>n</i> (%)                 | 21 (5.3%)          | 18 (6.9%)       | 3 (2.2%)        | 6 (0.8%)                | <0.001   |
| Other liver disease, <i>n</i> (%) | 39 (9.9%)          | 33 (12.7%)      | 6 (4.4%)        | 21 (2.7%)               | <0.001   |
| CAD, <i>n</i> (%)                 | 113 (28.7%)        | 69 (26.6%)      | 44 (32.6%)      | 258 (32.7%)             | 0.16     |
| Stroke, <i>n</i> (%)              | 7 (1.8%)           | 4 (1.5%)        | 3 (2.2%)        | 132 (16.8%)             | <0.001   |
| *Smoking, <i>n</i> (%)            | 188 (47.7%)        | 114 (44%)       | 74 (55.2%)      | 374 (47.7%)             | 0.99     |
| ^Alcohol use, <i>n</i> (%)        | 210 (53.3%)        | 136 (52.5%)     | 73 (54.5%)      | 596 (75.9%)             | <0.001   |

\*If patient ever had a history of smoking; ^if patient ever had a history of alcohol use.

# p-value comparing all cases vs all controls
