# Supplementary material
Source: PubMed Central journal article supplement (PMC8155698)
Supplement: NIHMS1663285-supplement-Supplemental_Table_2.pdf [file NIHMS1663285-supplement-Supplemental_Table_2.pdf]

**Manuscript No: HEP-19-1254.R1**

Supplemental Table 2. Comparing duration of statins use among statin users in matched cases and controls

| <b>Statin Duration</b> | <b>All ECC</b> | <b>*All controls</b> | <b>p-value</b>   | <b>pCCA</b> | <b>pCCA controls</b> | <b>p-value</b>   | <b>dCCA</b> | <b>dCCA controls</b> | <b>p-value</b>   |
|------------------------|----------------|----------------------|------------------|-------------|----------------------|------------------|-------------|----------------------|------------------|
| <1 year                | 10             | 7                    | <b>&lt;0.001</b> | 7           | 5                    | <b>&lt;0.001</b> | 3           | 2                    | <b>&lt;0.001</b> |
| 1-3 years              | 10             | 59                   |                  | 6           | 45                   |                  | 4           | 14                   |                  |
| 3-5 years              | 10             | 33                   |                  | 5           | 18                   |                  | 5           | 15                   |                  |
| >5years                | 26             | 283                  |                  | 15          | 197                  |                  | 11          | 86                   |                  |

\*382 out of the 403 control statin users and 56 out of 73 cases statin users had duration of statin usage available
